# Supplementary material for: Measuring serum melatonin in postmenopausal women: Implications for epidemiologic studies and breast cancer studies
Source: PLoS One. 2018 Apr 11;13(4):e0195666. doi: 10.1371/journal.pone.0195666 (PMC5895067; doi:10.1371/journal.pone.0195666)
Supplement: S1 Dataset — (XLS) [file pone.0195666.s001.xls]

## Sheet: MelatoninData_PlosOne upload
Subject ID	Menopause status at Enrollment 1=yes 2=yes from surgery	Reason for menopause Natural Age 55+ Surgical	Age at blood draw	Time at blood draw	Prediagnostic HRT Use 0=none 1=yes 2=??	# Months on HRT	BMI at blood draw	Replicate for subject?	Melatonin levels (final)	Measurement 1 or 2
StudyID	Menop_Status	Menop_Reason	bd_age	bd_time	predxhrt	hrtmos	BMI_BloodDraw	Have_Replicate	mel	measure
1	2	Surgical	59	1899-12-31 08:30:00	2	192	27.5	1	9.03	1
1	2	Surgical	59	1899-12-31 08:30:00	2	192	27.5	1	9.24	2
2	2	Surgical	77	1899-12-31 07:50:00	2	432	31.4	0	15.26	1
3	2	Surgical	58	1899-12-31 08:35:00	2	108	33.5	1	2.99	1
3	2	Surgical	58	1899-12-31 08:35:00	2	108	33.5	1	3.6	2
4	2	Surgical	80	1899-12-31 09:47:00	1	348	25.8	1	28.48	1
4	2	Surgical	80	1899-12-31 09:47:00	1	348	25.8	1	25.29	2
5	1	Natural	70	1899-12-31 09:55:00	2	264	24.6	1	2.34	1
5	1	Natural	70	1899-12-31 09:55:00	2	264	24.6	1	2.79	2
6	1	Age 55+	56	1899-12-31 08:30:00	1	84	27.1	0	6.09	1
7	1	Natural	67	1899-12-31 07:15:00	1	204	22.4	1	8.81	1
7	1	Natural	67	1899-12-31 07:15:00	1	204	22.4	1	9.14	2
8	1	Natural	66	1899-12-31 07:35:00	1	120	18.1	0	2.48	1
9	1	Natural	71	1899-12-31 09:00:00	1	60	26.6	0	26.04	1
10	1	Natural	66	1899-12-31 09:35:00	1	180	22.1	1	5.21	1
10	1	Natural	66	1899-12-31 09:35:00	1	180	22.1	1	4.7	2
11	1	Natural	57	1899-12-31 07:10:00	1	60	26.4	0	22.31	1
12	1	Natural	61	1899-12-31 08:27:00	1	108	43	1	11.9	1
12	1	Natural	61	1899-12-31 08:27:00	1	108	43	1	12.29	2
13	1	Natural	69	1899-12-31 09:13:00	1	156	25.7	0	0.64	1
14	1	Natural	65	1899-12-31 09:40:00	1	168	45	0	10.73	1
15	1	Natural	79	1899-12-31 08:50:00	1	576	20.1	1	6.53	1
15	1	Natural	79	1899-12-31 08:50:00	1	576	20.1	1	6.56	2
16	2	Surgical	64	1899-12-31 09:40:00	2	252	21.8	1	3.61	1
16	2	Surgical	64	1899-12-31 09:40:00	2	252	21.8	1	2.66	2
17	1	Age 55+	75	1899-12-31 09:25:00	1	432	23.7	1	10.4	1
17	1	Age 55+	75	1899-12-31 09:25:00	1	432	23.7	1	10.65	2
18	1	Natural	64	1899-12-31 07:55:00	2	144	22.4	1	14.33	1
18	1	Natural	64	1899-12-31 07:55:00	2	144	22.4	1	12.75	2
19	1	Natural	48	1899-12-31 09:15:00	1	12	20.9	0	6.31	1
20	1	Natural	74	1899-12-31 10:35:00	1	276	26.8	1	2.27	1
20	1	Natural	74	1899-12-31 10:35:00	1	276	26.8	1	2.24	2
21	1	Natural	69	1899-12-31 07:50:00	1	120	20.3	1	0.57	1
21	1	Natural	69	1899-12-31 07:50:00	1	120	20.3	1	0.81	2
22	1	Natural	73	1899-12-31 08:55:00	1	96	26	1	24.06	1
22	1	Natural	73	1899-12-31 08:55:00	1	96	26	1	25.09	2
23	1	Natural	78	1899-12-31 09:00:00	1	36	45.8	0	7.22	1
24	2	Surgical	71	1899-12-31 08:10:00	1	240	24.8	1	47.31	1
24	2	Surgical	71	1899-12-31 08:10:00	1	240	24.8	1	41	2
25	1	Natural	59	1899-12-31 06:50:00	0	0	30.5	1	3.7	1
25	1	Natural	59	1899-12-31 06:50:00	0	0	30.5	1	3.36	2
26	1	Natural	59	1899-12-31 07:45:00	1	48	24.2	0	22.16	1
27	1	Natural	72	1899-12-31 07:40:00	1	264	23.8	0	5.31	1
28	1	Age 55+	60	1899-12-31 10:05:00	1	168	25.9	0	4.71	1
29	1	Natural	73	1899-12-31 08:40:00	1	180	22.5	0	8.39	1
30	1	Age 55+	63	1899-12-31 08:40:00	0	0	29.3	1	41.4	1
30	1	Age 55+	63	1899-12-31 08:40:00	0	0	29.3	1	57.7	2
31	1	Natural	76	1899-12-31 09:00:00	0	0	26.1	0	11.94	1
32	1	Age 55+	76	1899-12-31 09:15:00	1	372	24.7	0	17.05	1
33	1	Natural	58	1899-12-31 08:05:00	1	72	39.6	1	9.28	1
33	1	Natural	58	1899-12-31 08:05:00	1	72	39.6	1	10.16	2
34	1	Age 55+	62	1899-12-31 07:45:00	2	96	35.2	0	7.46	1
35	1	Natural	59	1899-12-31 09:10:00	2	96	21.9	0	2.85	1
36	2	Surgical	62	1899-12-31 07:54:00	1	120	22.6	0	2.49	1
37	1	Age 55+	79	1899-12-31 08:55:00	1	156	23.1	0	7	1
38	1	Natural	67	1899-12-31 10:00:00	0	0	48.1	0	2.3	1
39	1	Age 55+	70	1899-12-31 08:35:00	1	48	30.3	0	4.56	1
40	1	Natural	72	1899-12-31 10:38:00	2	48	28.4	0	4.67	1
41	1	Natural	64	1899-12-31 09:10:00	1	192	28.1	0	12.9	1
42	1	Natural	75	1899-12-31 08:40:00	2	108	23.4	0	2.26	1
43	2	Surgical	73	1899-12-31 07:59:00	2	276	30.4	0	62.6	1
44	1	Natural	75	1899-12-31 09:23:00	1	108	30.9	0	2.99	1
45	1	Age 55+	65	1899-12-31 09:12:00	1	180	28.6	1	13.02	1
45	1	Age 55+	65	1899-12-31 09:12:00	1	180	28.6	1	13.2	2
46	1	Natural	61	1899-12-31 08:00:00	1	144	28.5	0	1.03	1
47	1	Natural	61	1899-12-31 08:23:00	1	96	23.9	0	1.1	1
